# Supplementary material for: Tolbutamide induces conformational change and promotes albumin glycation
Source: Royal Society of Chemistry journal article supplement (doi:10.1039/c5ra03839a), 2015-01-01

## Supplementary Fig S2

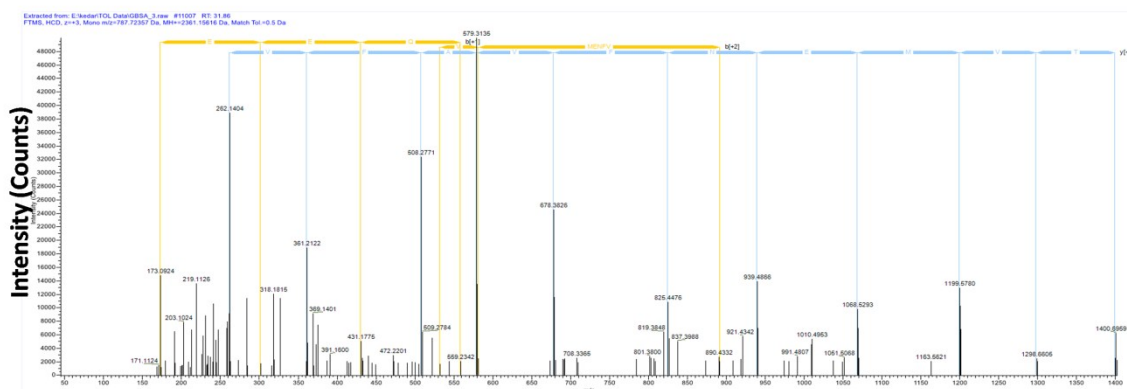

A T E E Q L k T V M E N F V A F V D K

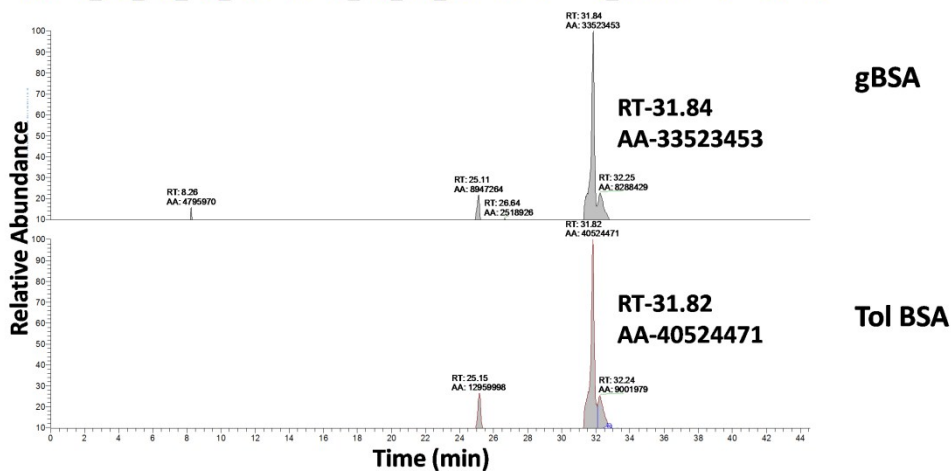

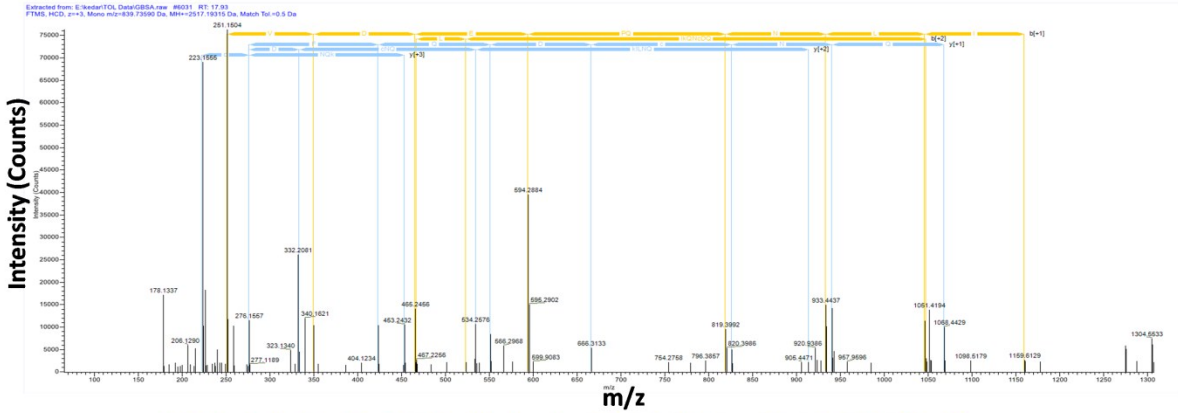

H L V D E P Q N L I k Q N c D Q F E K

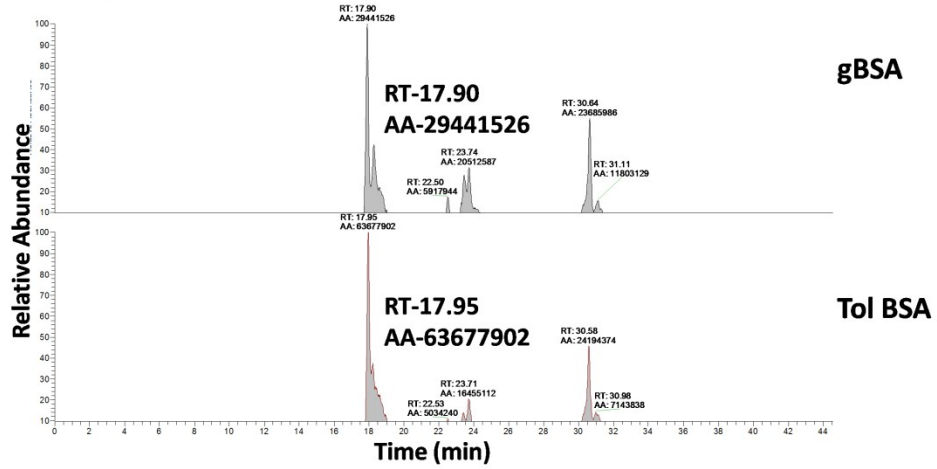

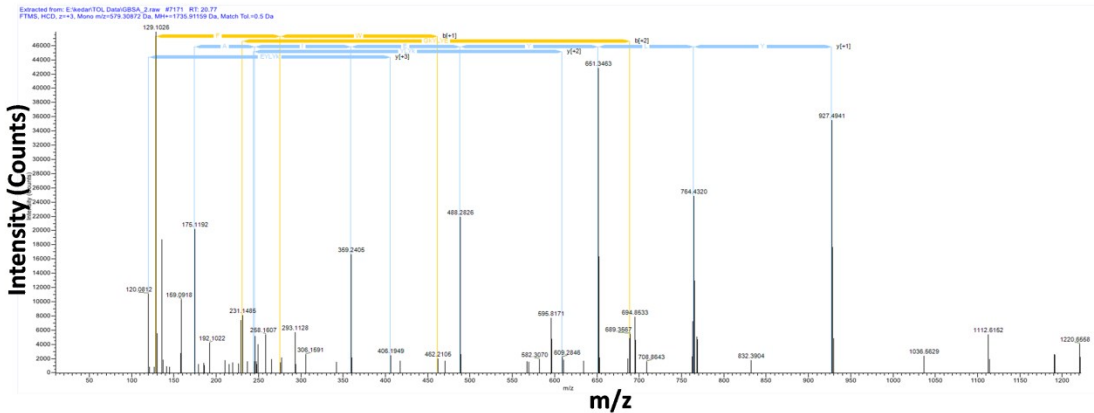

K] F] W] G] k] Y] L] Y] E] I] A] R

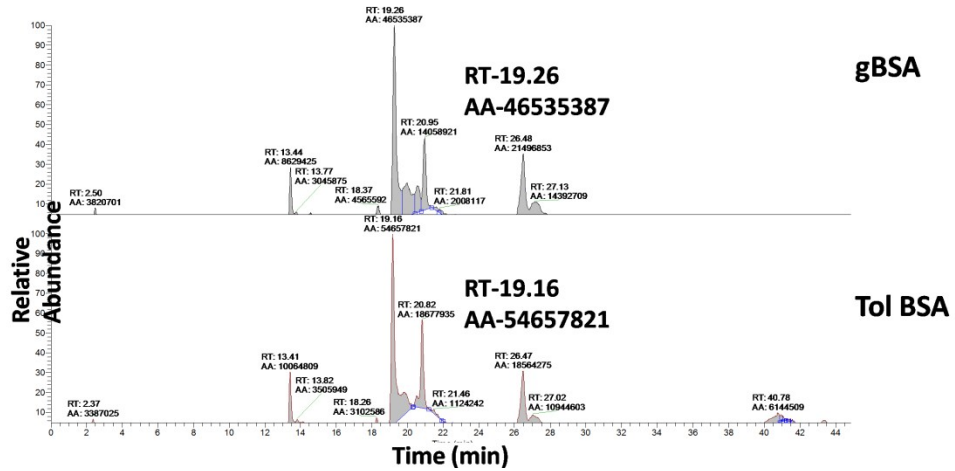

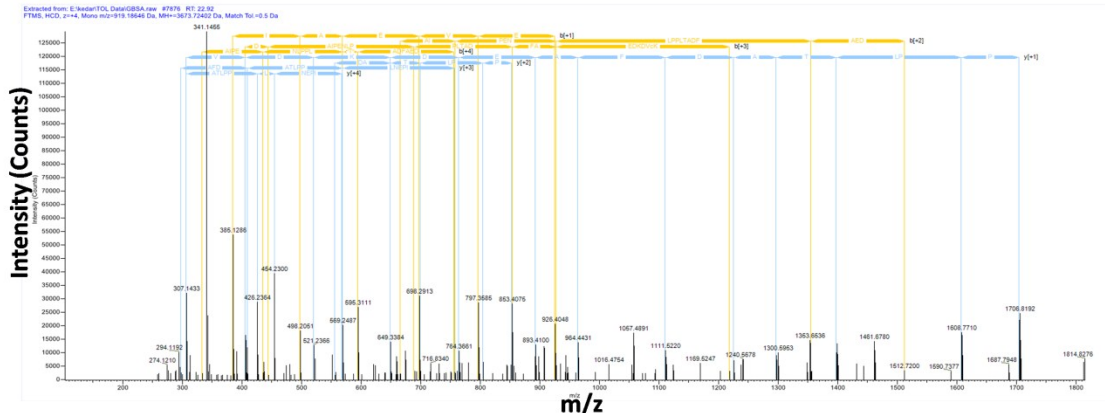

S H c I A E V E k D A I P E N L P P L T A D F A E D K D V c K

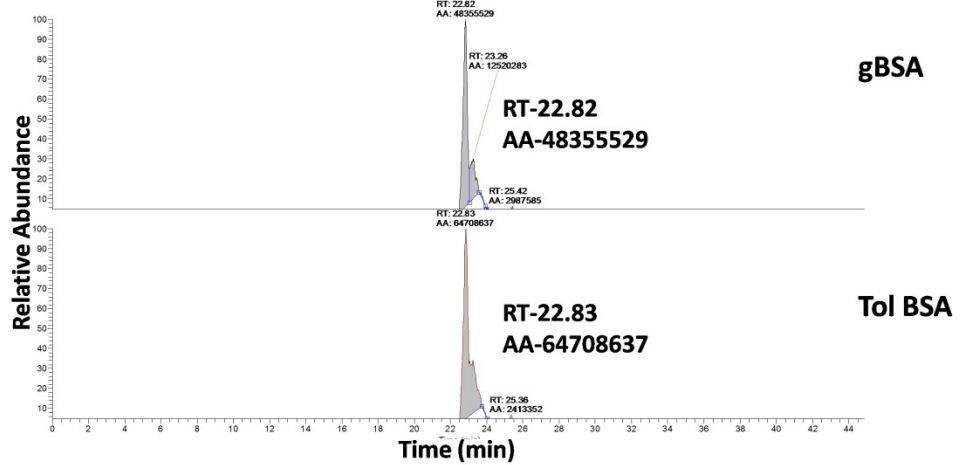

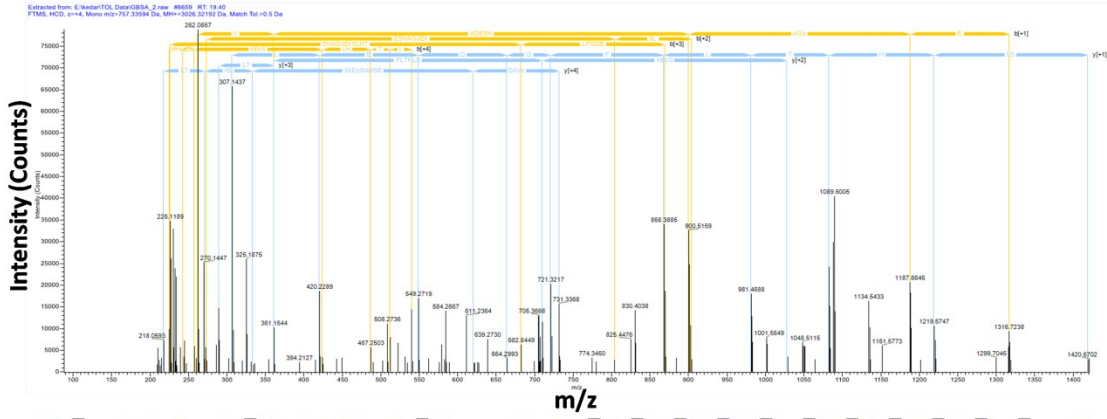

T [c] V A D E S H A G c E k S L H T L F G D E L c K

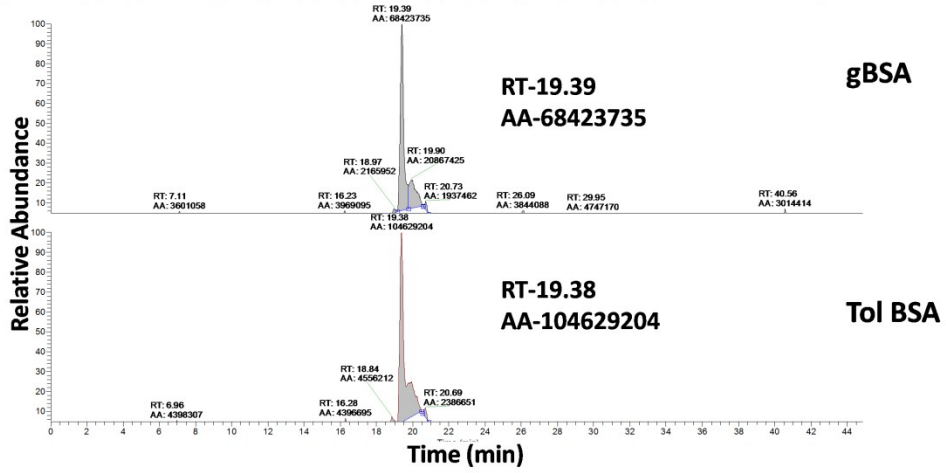

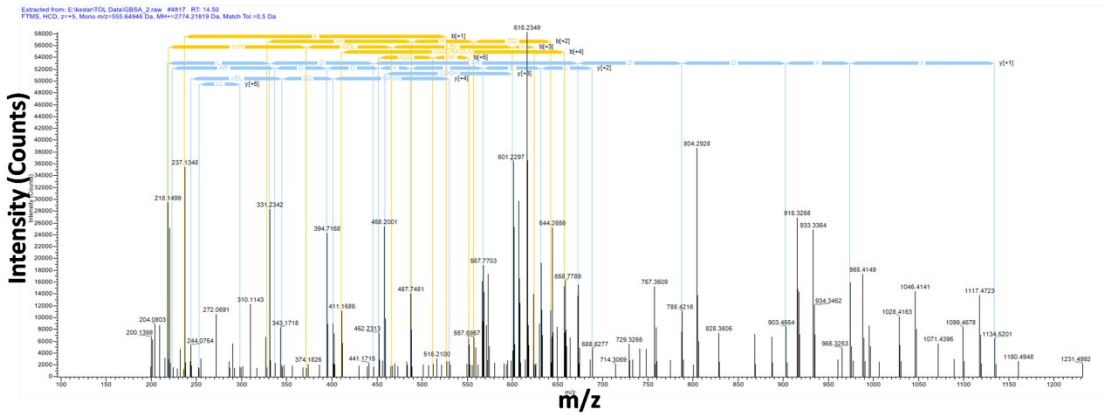

V H ] k ] E ] c ] c ] H ] G ] D ] L ] L ] E ] c ] A ] D ] D ] R ] A ] D ] L ] A ] K ]

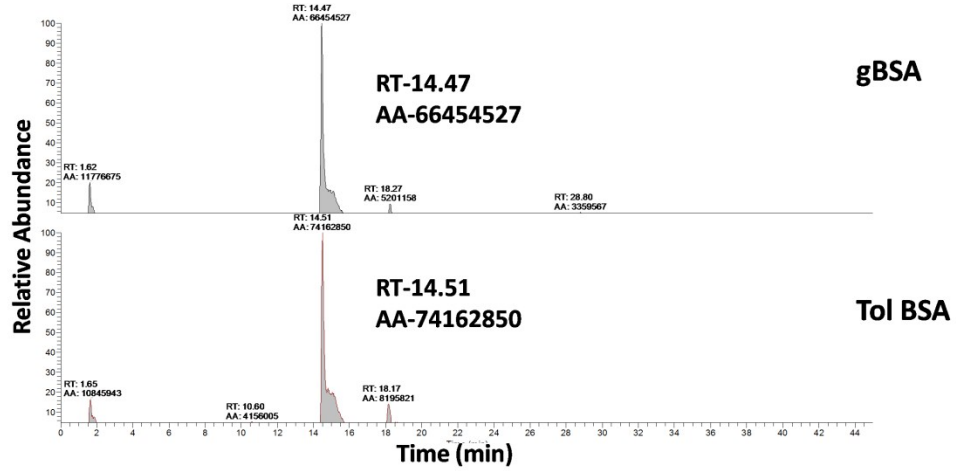

Supplement: c5ra03839a2.pdf [file c5ra03839a2.pdf]
