# Supplementary material for: Tolbutamide induces conformational change and promotes albumin glycation
Source: Royal Society of Chemistry journal article supplement (doi:10.1039/c5ra03839a), 2015-01-01
Supplement: c5ra03839a3.pdf [file c5ra03839a3.pdf]

## Supplementary Table S1

### The list of modifications and their respective $\Delta m$ for mass spectrometric analysis

| Modifications                                | Delta mass (Da) |
|----------------------------------------------|-----------------|
| Hexose (Hex)                                 | 162.05282       |
| Carboxymethyl (CML)                          | 58.00548        |
| Carboxyethyl (CEL)                           | 72.02113        |
| Fructosyl-lysine (FL-1H <sub>2</sub> O)      | 144.0423        |
| Carbamidomethyl (CAM)<br>Static modification | 57.02146        |

**Abbreviations:** Mod-Modification, CS-Charge state, XC-Xcorr, RT-Retention time.

**List of AGE modified peptides of BSA in presence and absence of  
Glucose and Tolbutamide (100uM)**

**Native BSA**

| S. No | Peptide sequence    | Mod    | m/z       | MH+        | CS (+) | XC   | RT (min) |
|-------|---------------------|--------|-----------|------------|--------|------|----------|
| 1     | <b>K</b> *QTALVELLK | K1-Hex | 435.59366 | 1304.76642 | 3      | 2.22 | 18.61    |

**Glycated BSA**

| S. No | Peptide sequence                                                          | Mod                                         | m/z       | MH+        | CS (+) | XC   | RT (min) |
|-------|---------------------------------------------------------------------------|---------------------------------------------|-----------|------------|--------|------|----------|
| 1     | AFDE <b>K</b> *LFTFHAD <b>I</b> CTLPDTEK                                  | K5-Hex,<br>C14-CAM                          | 665.81659 | 2660.24453 | 4      | 1.37 | 24.17    |
| 2     | ATEEQL <b>K</b> *TVMENFVAFV <b>D</b> K                                    | K7-Hex                                      | 787.72357 | 2361.15616 | 3      | 3.77 | 31.86    |
| 3     | <b>F</b> <b>K</b> *DLGEEHF <b>K</b>                                       | K2-Hex                                      | 471.22919 | 1411.67301 | 3      | 1.04 | 13.37    |
| 4     | HLVDEPQNLI <b>K</b> *Q <b>N</b> C <b>D</b> QF <b>E</b> K                  | K11-Hex,<br>C14-CAM                         | 839.7359  | 2517.19315 | 3      | 3.97 | 17.93    |
| 5     | KFWG <b>K</b> *YLYE <b>I</b> AR                                           | K5-Hex                                      | 579.30872 | 1735.91159 | 3      | 2.67 | 20.77    |
| 6     | <b>K</b> *QTALVELLK                                                       | K1-Hex                                      | 652.88733 | 1304.76738 | 2      | 2.72 | 20.16    |
| 7     | L <b>A</b> <b>K</b> *EYEATLEE <b>C</b> <b>C</b> AK                        | K3-Hex,<br>C12-CAM,<br>C13-CAM              | 659.63263 | 1976.88333 | 3      | 2.46 | 14.33    |
| 8     | LAKEYEATLEE <b>C</b> <b>C</b> AK*DDPH <b>A</b> C <b>Y</b> STV <b>F</b> DK | K15-Hex,<br>C12-CAM,<br>C13-CAM,<br>C21-CAM | 703.30908 | 3512.51630 | 5      | 3.03 | 18.29    |
| 9     | <b>L</b> <b>K</b> *E <b>C</b> <b>C</b> DKPLLE <b>K</b>                    | K2-Hex,<br>C4-CAM,<br>C5-CAM                | 424.46375 | 1694.83315 | 4      | 1.78 | 11.65    |
| 10    | <b>L</b> <b>K</b> *HLVDEPQNLI <b>K</b>                                    | K2-Hex,                                     | 570.32043 | 1708.94675 | 3      | 2.05 | 16.24    |
| 11    | LVNELTEFA <b>K</b> *T <b>C</b> VADESHAG <b>C</b> EK                       | K10-Hex,<br>C12-CAM,<br>C21-CAM             | 693.31927 | 2770.25527 | 4      | 3.41 | 21.15    |
| 12    | SH <b>C</b> IAEVE <b>K</b> *DAIPENLPPLTADFAEDKD <b>V</b> <b>C</b> K       | K9-CML,<br>C3-CAM,<br>C30-CAM               | 714.74445 | 3569.69312 | 5      | 4.11 | 22.6     |
| 13    | SH <b>C</b> IAEVE <b>K</b> *DAIPENLPPLTADFAEDKD <b>V</b> <b>C</b> K       | K9-Hex,<br>C3-CAM,                          | 919.18646 | 3673.72402 | 4      | 4.91 | 22.92    |

|    |                                                           |                                            |           |            |   |      |       |
|----|-----------------------------------------------------------|--------------------------------------------|-----------|------------|---|------|-------|
|    |                                                           | C30-CAM                                    |           |            |   |      |       |
| 14 | SLHTLFGDEL <b>CK</b> *VASLR                               | K12-Hex,<br>C11-CAM                        | 527.77325 | 2108.07119 | 4 | 1.86 | 25.24 |
| 15 | <b>TC</b> VADESHAG <b>CEK</b> *SLHTLFGDEL <b>CK</b>       | K13-Hex,<br>C2-CAM,<br>C11-CAM,<br>C24-CAM | 757.33594 | 3026.32192 | 4 | 3.73 | 19.4  |
| 16 | <b>VHK</b> * <b>EC</b> CHGDLLE <b>C</b> ADDRADLAK         | K3-Hex,<br>C5-CAM,<br>C6-CAM,<br>C13-CAM   | 555.64946 | 2774.21819 | 5 | 2.29 | 14.5  |
| 17 | YNGV <b>FQ</b> EC <b>CA</b> ED <b>K</b> *G <b>AC</b> LLPK | K14-CML,<br>C8-CAM,<br>C9-CAM,<br>C17-CAM  | 849.04419 | 2545.11802 | 3 | 2.42 | 20.04 |

### TOL BSA

| S. No | Peptide sequence                                         | Mod                                         | m/z       | MH+        | CS (+) | XC   | RT (min) |
|-------|----------------------------------------------------------|---------------------------------------------|-----------|------------|--------|------|----------|
| 1     | AFDE <b>K</b> *LFTFHADI <b>C</b> TLPDTEK                 | K5-Hex,<br>C14-CAM                          | 665.81714 | 2660.24672 | 4      | 1.25 | 24.12    |
| 2     | ATEEQL <b>K</b> *TVMENFVAFV <b>D</b> K                   | K7-Hex                                      | 787.72394 | 2361.15726 | 3      | 3.93 | 31.82    |
| 3     | <b>FK</b> *DLGEEH <b>F</b> K                             | K2-Hex                                      | 471.22928 | 1411.67328 | 3      | 1.11 | 13.49    |
| 4     | HLVDEPQNLIK* <b>QN</b> <b>C</b> DQ <b>F</b> EK           | K11-Hex,<br>C14-CAM                         | 839.73535 | 2517.19150 | 3      | 4.01 | 17.92    |
| 5     | KFWG <b>K</b> *YLYE <b>I</b> AR                          | K5-Hex                                      | 579.30896 | 1735.91233 | 3      | 2.52 | 20.97    |
| 6     | <b>K</b> *FWG <b>K</b> *YLYE <b>I</b> AR                 | K1-FL-1H20,<br>K5-CML                       | 597.30981 | 1789.91489 | 3      | 1.32 | 21.33    |
| 7     | <b>K</b> *QTALVELLK                                      | K1-Hex                                      | 652.88739 | 1304.76750 | 2      | 2.8  | 19.83    |
| 8     | <b>K</b> *QTALVELLK                                      | K1-FL-1H20                                  | 429.59048 | 1286.75690 | 3      | 1.95 | 19.86    |
| 9     | LAK*EYEATLEE <b>CCA</b> K                                | K3-Hex,<br>C12-CAM,<br>C13-CAM              | 659.63269 | 1976.88352 | 3      | 2.6  | 14.49    |
| 10    | LAK*EYEATLEE <b>CCA</b> KDDPHAC <b>Y</b> STV <b>F</b> DK | K3-Hex,<br>C12-CAM,<br>C13-CAM,<br>C21-CAM  | 703.30841 | 3512.51295 | 5      | 3.14 | 18.28    |
| 11    | LAKEYEATLEE <b>CCA</b> K*DDPHAC <b>Y</b> STV <b>F</b> DK | K15-Hex,<br>C12-CAM,<br>C13-CAM,<br>C21-CAM | 703.30865 | 3512.51417 | 5      | 3.13 | 18.37    |

|    |                                   |                                            |           |            |   |      |       |
|----|-----------------------------------|--------------------------------------------|-----------|------------|---|------|-------|
| 12 | LK*ECCDKPLLEK                     | K2-Hex,<br>C4-CAM,<br>C5-CAM               | 424.4635  | 1694.83217 | 4 | 1.88 | 11.68 |
| 13 | LK*HLVDEPQNLIK                    | K2-Hex                                     | 570.31964 | 1708.94437 | 3 | 1.84 | 16.24 |
| 14 | LVNELTEFAK*TCVADESHAGCEK          | K10-Hex,<br>C12-CAM,<br>C21-CAM            | 693.31995 | 2770.25796 | 4 | 3.56 | 21.16 |
| 15 | RHPYFYAPELLYYANK*                 | K16-CML                                    | 526.51843 | 2103.05190 | 4 | 2.07 | 23.39 |
| 16 | SHCIAEVEK*DAIPENLPPLTADFAEDKDVCCK | K9-CML,<br>C3-CAM,<br>C30-CAM              | 714.74609 | 3569.70136 | 5 | 3.82 | 22.64 |
| 17 | SHCIAEVEK*DAIPENLPPLTADFAEDKDVCCK | K9-Hex,<br>C3-CAM,<br>C30-CAM              | 735.55029 | 3673.72236 | 4 | 4.57 | 23.04 |
| 18 | SLHTLFGDELCK*VASLR                | K12-Hex,<br>C11-CAM                        | 527.77307 | 2108.07046 | 4 | 1.8  | 25.27 |
| 19 | TCVADESHAGCEK*SLHTLFGDELCK        | K13-Hex,<br>C2-CAM,<br>C11-CAM,<br>C24-CAM | 757.33514 | 3026.31875 | 4 | 3.59 | 19.4  |
| 20 | VHK*ECCHGDLLECADRADLAK            | K3-Hex,<br>C5-CAM,<br>C6-CAM,<br>C13-CAM   | 555.64917 | 2774.21674 | 5 | 2.69 | 14.49 |
| 21 | YNGVFQECCQAEDK*GACLLPK            | K14-CML,<br>C8-CAM,<br>C9-CAM,<br>C17-CAM  | 849.0459  | 2545.12314 | 3 | 2.09 | 19.92 |
